# Supplementary material for: Multimorbidity and overall survival among women with breast cancer: results from the South African Breast Cancer and HIV Outcomes Study
Source: Springer Nature journal article supplement (doi:10.1186/s13058-023-01603-w), 2023-01-23
Supplement: MOESM1 [file 23946420]

**Supplementary Table 1 Absolute survival differences overall and by the number of chronic conditions in the SABCHO cohort.**

| <b>Absolute survival</b> | <b>Total (All)</b>  | <b>&lt;2 chronic conditions</b> | <b>≥2 chronic conditions</b> |
|--------------------------|---------------------|---------------------------------|------------------------------|
|                          | <b>% (95%CI)</b>    | <b>% (95%CI)</b>                | <b>% (95%CI)</b>             |
| <b>2 years</b>           | 73.1% (71.5 – 74.6) | 74.4% (72.3 – 76.4)             | 71.5% (69.1 – 73.8)          |
| <b>3 years</b>           | 62.7% (60.9 – 64.4) | 64.3% (61.9 – 66.6)             | 60.8% (58.1 – 63.3)          |
| <b>5 years</b>           | 45.9% (43.6 – 48.2) | 47.1% (44.0 – 50.2)             | 44.4% (41.1 – 47.7)          |

% (Percentage surviving), CI (Confidence interval)
